# Supplementary material for: The Role of Biomarkers and Scores in Describing Urosepsis
Source: MDPI journal article supplement (doi:10.3390/medicina59030597), 2023-03-17
Supplement: s1 [file s1]

**Table S1: Pairwise comparison of ROC curves for Deceased group**

| procalcitonina ~ leucocyte |                  |
|----------------------------|------------------|
| Difference between areas   | 0.196            |
| Standard Error °           | 0.0916           |
| 95% Confidence Interval    | 0.0162 to 0.375  |
| z statistic                | 2.137            |
| Significance level         | P = 0.033        |
| procalcitonina ~ CCI       |                  |
| Difference between areas   | 0.0907           |
| Standard Error °           | 0.0703           |
| 95% Confidence Interval    | -0.0472 to 0.229 |
| z statistic                | 1.290            |
| Significance level         | P = 0.197        |
| procalcitonina ~ SOFA      |                  |
| Difference between areas   | 0.121            |
| Standard Error °           | 0.0536           |
| 95% Confidence Interval    | 0.0160 to 0.226  |
| z statistic                | 2.258            |
| Significance level         | P = 0.024        |
| procalcitonina ~ qSOFA     |                  |
| Difference between areas   | 0.131            |
| Standard Error °           | 0.0595           |
| 95% Confidence Interval    | 0.0142 to 0.247  |
| z statistic                | 2.199            |
| Significance level         | P = 0.028        |
| leucocyte ~ CCI            |                  |
| Difference between areas   | 0.287            |
| Standard Error °           | 0.0872           |
| 95% Confidence Interval    | 0.116 to 0.457   |
| z statistic                | 3.287            |
| Significance level         | P = 0.001        |
| leucocyte ~ SOFA           |                  |
| Difference between areas   | 0.317            |
| Standard Error °           | 0.0648           |
| 95% Confidence Interval    | 0.190 to 0.444   |
| z statistic                | 4.888            |
| Significance level         | P < 0.001        |
| leucocyte ~ qSOFA          |                  |
| Difference between areas   | 0.327            |
| Standard Error °           | 0.0635           |
| 95% Confidence Interval    | 0.202 to 0.451   |
| z statistic                | 5.142            |
| Significance level         | P < 0.001        |
| CCI ~ SOFA                 |                  |
| Difference between areas   | 0.0304           |
| Standard Error °           | 0.0482           |
| 95% Confidence Interval    | -0.0640 to 0.125 |

|                             |                   |
|-----------------------------|-------------------|
| z statistic                 | 0.631             |
| Significance level          | P = 0.528         |
| CCI ~ qSOFA                 |                   |
| Difference between areas    | 0.0401            |
| Standard Error <sup>c</sup> | 0.0533            |
| 95% Confidence Interval     | -0.0643 to 0.145  |
| z statistic                 | 0.753             |
| Significance level          | P = 0.451         |
| SOFA ~ qSOFA                |                   |
| Difference between areas    | 0.00971           |
| Standard Error <sup>c</sup> | 0.0268            |
| 95% Confidence Interval     | -0.0427 to 0.0622 |
| z statistic                 | 0.363             |
| Significance level          | P = 0.717         |

**Table S2: Pairwise comparison of ROC curves for SIRS group**

|                             |                    |
|-----------------------------|--------------------|
| procalcitonina ~ leucocyte  |                    |
| Difference between areas    | 0.418              |
| Standard Error <sup>c</sup> | 0.0508             |
| 95% Confidence Interval     | 0.319 to 0.518     |
| z statistic                 | 8.231              |
| Significance level          | P < 0.001          |
| procalcitonina ~ SOFA       |                    |
| Difference between areas    | 0.0474             |
| Standard Error <sup>c</sup> | 0.0293             |
| 95% Confidence Interval     | -0.00998 to 0.105  |
| z statistic                 | 1.619              |
| Significance level          | P = 0.105          |
| procalcitonina ~ qSOFA      |                    |
| Difference between areas    | 0.0922             |
| Standard Error <sup>c</sup> | 0.0288             |
| 95% Confidence Interval     | 0.0358 to 0.149    |
| z statistic                 | 3.201              |
| Significance level          | P = 0.001          |
| leucocyte ~ SOFA            |                    |
| Difference between areas    | 0.371              |
| Standard Error <sup>c</sup> | 0.0497             |
| 95% Confidence Interval     | 0.274 to 0.469     |
| z statistic                 | 7.460              |
| Significance level          | P < 0.001          |
| leucocyte ~ qSOFA           |                    |
| Difference between areas    | 0.326              |
| Standard Error <sup>c</sup> | 0.0513             |
| 95% Confidence Interval     | 0.226 to 0.427     |
| z statistic                 | 6.365              |
| Significance level          | P < 0.001          |
| SOFA ~ qSOFA                |                    |
| Difference between areas    | 0.0448             |
| Standard Error <sup>c</sup> | 0.0264             |
| 95% Confidence Interval     | -0.00704 to 0.0966 |

|                    |           |
|--------------------|-----------|
| z statistic        | 1.694     |
| Significance level | P = 0.090 |

**Table S3: Pairwise comparison of ROC curves for Sepsis group**

|                             |                   |
|-----------------------------|-------------------|
| procalcitonina ~ leucocyte  |                   |
| Difference between areas    | 0.0258            |
| Standard Error <sup>c</sup> | 0.0670            |
| 95% Confidence Interval     | -0.105 to 0.157   |
| z statistic                 | 0.385             |
| Significance level          | P = 0.701         |
| procalcitonina ~ SOFA       |                   |
| Difference between areas    | 0.0795            |
| Standard Error <sup>c</sup> | 0.0885            |
| 95% Confidence Interval     | -0.0940 to 0.253  |
| z statistic                 | 0.898             |
| Significance level          | P = 0.369         |
| procalcitonina ~ qSOFA      |                   |
| Difference between areas    | 0.0509            |
| Standard Error <sup>c</sup> | 0.0848            |
| 95% Confidence Interval     | -0.115 to 0.217   |
| z statistic                 | 0.600             |
| Significance level          | P = 0.548         |
| leucocyte ~ SOFA            |                   |
| Difference between areas    | 0.0537            |
| Standard Error <sup>c</sup> | 0.0587            |
| 95% Confidence Interval     | -0.0613 to 0.169  |
| z statistic                 | 0.916             |
| Significance level          | P = 0.360         |
| leucocyte ~ qSOFA           |                   |
| Difference between areas    | 0.0251            |
| Standard Error <sup>c</sup> | 0.0570            |
| 95% Confidence Interval     | -0.0866 to 0.137  |
| SOFA ~ qSOFA                |                   |
| Difference between areas    | 0.0286            |
| Standard Error <sup>c</sup> | 0.0230            |
| 95% Confidence Interval     | -0.0164 to 0.0736 |
| z statistic                 | 1.245             |
| Significance level          | P = 0.213         |

**Table S4: Pairwise comparison of ROC curves for Septic Shock group**

|                             |        |
|-----------------------------|--------|
| procalcitonina ~ leucocyte  |        |
| Difference between areas    | 0.234  |
| Standard Error <sup>c</sup> | 0.0685 |

|                          |                   |
|--------------------------|-------------------|
| 95% Confidence Interval  | 0.0992 to 0.368   |
| z statistic              | 3.407             |
| Significance level       | P = 0.001         |
| procalcitonina ~ SOFA    |                   |
| Difference between areas | 0.0985            |
| Standard Error °         | 0.0381            |
| 95% Confidence Interval  | 0.0239 to 0.173   |
| z statistic              | 2.587             |
| Significance level       | P = 0.010         |
| procalcitonina ~ qSOFA   |                   |
| Difference between areas | 0.0894            |
| Standard Error °         | 0.0398            |
| 95% Confidence Interval  | 0.0114 to 0.167   |
| z statistic              | 2.246             |
| Significance level       | P = 0.025         |
| leucocyte ~ SOFA         |                   |
| Difference between areas | 0.332             |
| Standard Error °         | 0.0589            |
| 95% Confidence Interval  | 0.216 to 0.448    |
| z statistic              | 5.633             |
| Significance level       | P < 0.001         |
| leucocyte ~ qSOFA        |                   |
| Difference between areas | 0.323             |
| Standard Error °         | 0.0573            |
| 95% Confidence Interval  | 0.211 to 0.435    |
| z statistic              | 5.640             |
| Significance level       | P < 0.001         |
| SOFA ~ qSOFA             |                   |
| Difference between areas | 0.00909           |
| Standard Error °         | 0.0160            |
| 95% Confidence Interval  | -0.0222 to 0.0404 |
| z statistic              | 0.569             |
| Significance level       | P = 0.569         |

**Table S5: Spearmans' rho correlation between all variables**

|                    |                    |                         | varsta  | procalcitonina | leucocite | SOFA    | qSOFA   | CCI     | zileATI | Zile spitalizare |
|--------------------|--------------------|-------------------------|---------|----------------|-----------|---------|---------|---------|---------|------------------|
| Spearm<br>an's rho | varsta             | Correlation Coefficient | 1.000   | 0.251**        | -0.153*   | 0.392** | 0.291** | 0.688** | 0.102   | 0.164*           |
|                    |                    | Sig. (2-tailed)         | .       | 0.001          | 0.045     | 0.000   | 0.000   | 0.000   | 0.179   | 0.031            |
|                    |                    | N                       | 174     | 173            | 174       | 174     | 174     | 174     | 174     | 174              |
|                    | procalcitonin<br>a | Correlation Coefficient | 0.251** | 1.000          | 0.086     | 0.707** | 0.667** | 0.351** | 0.433** | 0.392**          |
|                    |                    | Sig. (2-tailed)         | 0.001   | .              | 0.259     | 0.000   | 0.000   | 0.000   | 0.000   | 0.000            |
|                    |                    | N                       | 173     | 173            | 173       | 173     | 173     | 173     | 173     | 173              |
|                    | leucocite          | Correlation Coefficient | -0.153* | 0.086          | 1.000     | 0.157*  | 0.153*  | -0.003  | 0.073   | -0.027           |
|                    |                    | Sig. (2-tailed)         | 0.045   | 0.259          | .         | 0.039   | 0.044   | 0.968   | 0.337   | 0.726            |
|                    |                    | N                       | 174     | 173            | 174       | 174     | 174     | 174     | 174     | 174              |
|                    | SOFA               | Correlation Coefficient | 0.392** | 0.707**        | 0.157*    | 1.000   | 0.834** | 0.500** | 0.500** | 0.343**          |
|                    |                    | Sig. (2-tailed)         | 0.000   | 0.000          | 0.039     | .       | 0.000   | 0.000   | 0.000   | 0.000            |
|                    |                    | N                       | 174     | 173            | 174       | 174     | 174     | 174     | 174     | 174              |
|                    | qSOFA              | Correlation Coefficient | 0.291** | 0.667**        | 0.153*    | 0.834** | 1.000   | 0.418** | 0.541** | 0.340**          |
|                    |                    | Sig. (2-tailed)         | 0.000   | 0.000          | 0.044     | 0.000   | .       | 0.000   | 0.000   | 0.000            |
|                    |                    | N                       | 174     | 173            | 174       | 174     | 174     | 174     | 174     | 174              |
|                    | CCI                | Correlation Coefficient | 0.688** | 0.351**        | -0.003    | 0.500** | 0.418** | 1.000   | 0.218** | 0.125            |
|                    |                    | Sig. (2-tailed)         | 0.000   | 0.000          | 0.968     | 0.000   | 0.000   | .       | 0.004   | 0.099            |
|                    |                    | N                       | 174     | 173            | 174       | 174     | 174     | 174     | 174     | 174              |
|                    | zileATI            | Correlation Coefficient | 0.102   | 0.433**        | 0.073     | 0.500** | 0.541** | 0.218** | 1.000   | 0.362**          |
|                    |                    | Sig. (2-tailed)         | 0.179   | 0.000          | 0.337     | 0.000   | 0.000   | 0.004   | .       | 0.000            |
|                    |                    | N                       | 174     | 173            | 174       | 174     | 174     | 174     | 174     | 174              |
|                    | zilespitalizare    | Correlation Coefficient | 0.164*  | 0.392**        | -0.027    | .343**  | .340**  | 0.125   | 0.362** | 1.000            |
|                    |                    | Sig. (2-tailed)         | 0.031   | 0.000          | 0.726     | 0.000   | 0.000   | 0.099   | 0.000   | .                |
|                    |                    | N                       | 174     | 173            | 174       | 174     | 174     | 174     | 174     | 174              |
